# Supplementary material
Source: MDPI journal article supplement (https://www.mdpi.com/2073-4441/8/4/163)
Supplement: s1 [file s1]

# Supplementary Materials: Potential Impacts of Food Production on Freshwater Availability Considering Water Sources

Shinjiro Yano, Naota Hanasaki, Norihiro Itsubo and Taikan Oki

Table S1. List of commodities.

| Crops                       | Livestocks                           |
|-----------------------------|--------------------------------------|
| Wheat                       | Cattle meat                          |
| Flour of wheat              | Offal of cattle, edible              |
| Bran of wheat               | Fat of cattle                        |
| Macaroni                    | Meat–cattle boneless (beef and veal) |
| Germ of wheat               | Cattle, butchered fat                |
| Bread                       | Preparation of beef                  |
| Bulgur                      | Pork                                 |
| Rice, paddy                 | Offal of pigs, edible                |
| Rice husked                 | Fat of pigs                          |
| Milled husked rice          | Pork                                 |
| Rice milled                 | Bacon and ham                        |
| Rice broken                 | Pig, butchered fat                   |
| Bran of rice                | Pork sausages                        |
| Rice bran oil               | Prepared pig meat                    |
| Cake rice bran              | Lard                                 |
| Rice flour                  | Chicken meat                         |
| Rice fermented beverages    | Offal and liver of chicken           |
| Barley                      | Fat liver prepared (foie gras)       |
| Pot barley                  | Chicken meat canned                  |
| Barley pearled              | Fat of poultry                       |
| Bran of barley              | Fat of poultry, rendered             |
| Barley flour and grits      |                                      |
| Malt                        |                                      |
| Malt extract                |                                      |
| Beer of barley              |                                      |
| Maize                       |                                      |
| Germ of maize               |                                      |
| Flour of maize              |                                      |
| Bran of maize               |                                      |
| Maize oil                   |                                      |
| Cake of maize               |                                      |
| Soybeans                    |                                      |
| Soybean oil                 |                                      |
| Cake of soybeans            |                                      |
| Soya sauce                  |                                      |
| Maize, green                |                                      |
| Maize for forage and silage |                                      |

**Table S2.** Water footprint inventory based on meteorological forcing data for the 1991–2000 period (km<sup>3</sup>/year).

| Land Type          | Water Source  | WFD  | GSWP3 | PFD  | Average | SD  |
|--------------------|---------------|------|-------|------|---------|-----|
| Rainfed cropland   | Precipitation | 2220 | 2502  | 2342 | 2354    | 115 |
|                    |               |      |       |      |         |     |
| Irrigated cropland | Precipitation | 772  | 839   | 762  | 774     | 49  |
|                    | Surface water | 757  | 954   | 828  | 846     | 82  |
|                    | Groundwater   | 223  | 547   | 335  | 369     | 134 |
| Total              |               | 3912 | 4842  | 4268 | 4344    | 380 |

**Table S3.** Water footprint inventory based on meteorological forcing data for the 2001–2008 period (km<sup>3</sup>/year).

| Land Type          | Water Source  | GSWP3 | PFD  | Average | SD  |
|--------------------|---------------|-------|------|---------|-----|
| Rainfed cropland   | Precipitation | 2538  | 2344 | 2441    | 97  |
|                    |               |       |      |         |     |
| Irrigated cropland | Precipitation | 852   | 759  | 805     | 46  |
|                    | Surface water | 944   | 798  | 871     | 73  |
|                    | Groundwater   | 595   | 355  | 475     | 120 |
| Total              |               | 4929  | 4256 | 4592    | 336 |

**Table S4.** Water scarcity footprint based on meteorological forcing data for the 1991–2000 period (km<sup>3</sup> H<sub>2</sub>Oeq/year).

| Land Type          | Water Source  | WFD    | GSWP3  | PFD    | Average | SD    |
|--------------------|---------------|--------|--------|--------|---------|-------|
| Rainfed cropland   | Precipitation | 2500   | 2988   | 2749   | 2746    | 199   |
|                    |               |        |        |        |         |       |
| Irrigated cropland | Precipitation | 869    | 1035   | 935    | 946     | 68    |
|                    | Surface water | 5506   | 7798   | 6234   | 6513    | 957   |
|                    | Groundwater   | 4925   | 10,919 | 7,636  | 7,827   | 2451  |
| Total              |               | 13,800 | 22,740 | 17,553 | 18,031  | 3,666 |

**Table S5.** Water scarcity footprint based on meteorological forcing data for the 2001–2008 period (km<sup>3</sup> H<sub>2</sub>Oeq/year).

| Land Type          | Water Source  | GSWP3  | PFD    | Average | SD   |
|--------------------|---------------|--------|--------|---------|------|
| Rainfed cropland   | Precipitation | 3037   | 2787   | 2912    | 125  |
|                    |               |        |        |         |      |
| Irrigated cropland | Precipitation | 1060   | 956    | 1008    | 52   |
|                    | Surface water | 7957   | 6704   | 7330    | 626  |
|                    | Groundwater   | 12,433 | 8412   | 10,422  | 2010 |
| Total              |               | 24,486 | 18,860 | 21,673  | 2813 |

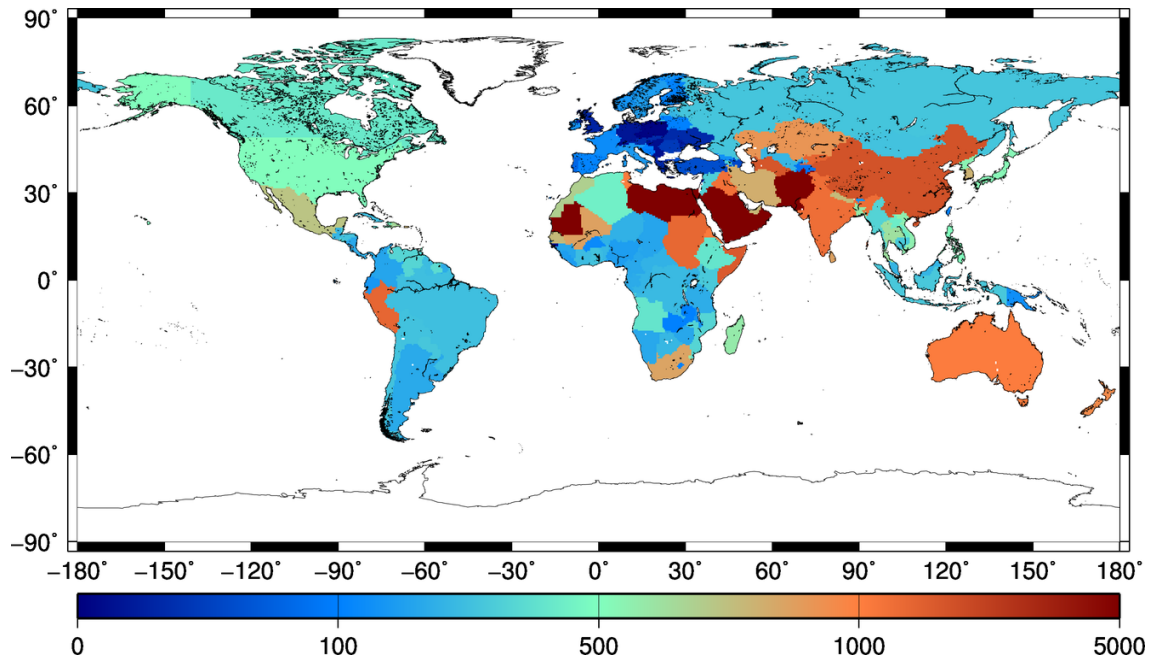

**Figure S1.** Water scarcity footprints related to agricultural activities in each country (mm H<sub>2</sub>Oeq/year).

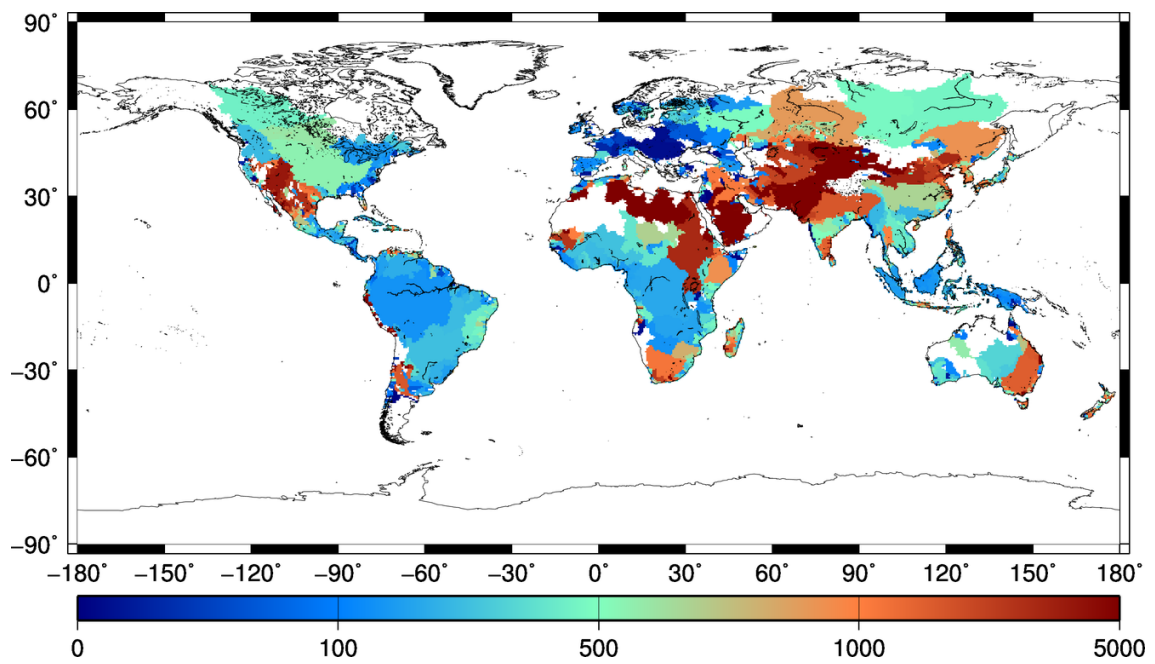

**Figure S2.** Water scarcity footprints related to agricultural activities in each basin (mm H<sub>2</sub>Oeq/year).
